# Supplementary material for: Liver Enzymes in a Cohort of Community-Dwelling Older Persons: Focus on Sex Contribution
Source: MDPI journal article supplement (doi:10.3390/nu14234973), 2022-11-23
Supplement: s1 [file s1]

**Table S1.** List of the 47 biochemical and health deficits included in the FI.

| Deficit                                                         |
|-----------------------------------------------------------------|
| <b>Biochemical parameters</b>                                   |
| Cholesterol $\leq 200$ mg/dL                                    |
| CRP $< 0.5$ mg/dL                                               |
| Vitamin B12 191-663 ng/L                                        |
| Folate 4.6-18.7 $\mu$ g/L                                       |
| 25-OH Vitamin D $> 30$ $\mu$ g/L                                |
| TSH 0.28-4.30 mIU/L                                             |
| <b>Signs</b>                                                    |
| Pain                                                            |
| Bowel incontinence                                              |
| Sleep disorders                                                 |
| BMI 21-30 kg/m <sup>2</sup>                                     |
| Edema                                                           |
| Tremor                                                          |
| <b>Disabilities</b>                                             |
| Mobility impairment                                             |
| ADL - disability in self-feeding                                |
| ADL - disability in dressing                                    |
| ADL - disability in bathing                                     |
| ADL - disability in transferring                                |
| ADL - disability in toileting                                   |
| ADL - incontinence                                              |
| IADL - disability in using telephone                            |
| IADL - disability in shopping                                   |
| IADL - disability in food preparation                           |
| IADL - disability in housekeeping                               |
| IADL - disability in doing laundry                              |
| IADL - disability in travelling by car or public transportation |
| IADL - disability in medication use                             |
| IADL - disability in handling finances                          |
| <b>Diseases</b>                                                 |
| Hypertension                                                    |
| Diabetes                                                        |
| Congestive heart failure                                        |
| Coronary heart disease                                          |
| Cardiac arrhythmia                                              |
| Chronic obstructive pulmonary disease                           |
| Decreased visual acuity                                         |
| Hearing loss                                                    |
| Osteoarthritis                                                  |
| Vascular endothelial abnormalities                              |
| Chronic renal insufficiency                                     |
| Hepatopathy                                                     |
| Depression                                                      |
| Cerebrovascular disease                                         |
| Cognitive impairment                                            |
| Cancer                                                          |

---

Osteoporosis

Anemia

Diverticulosis

Mild cognitive impairment

---

CRP: C-Reactive Protein, TSH: Thyroid-Stimulating Hormone, BMI: Body Mass Index, ADL: Activity of Daily Living, IADL: Instrumental Activity of Daily Living.
